# Supplementary material for: Climate Clever Clovers: New Paradigm to Reduce the Environmental Footprint of Ruminants by Breeding Low Methanogenic Forages Utilizing Haplotype Variation
Source: Front Plant Sci. 2017 Sep 5;8:1463. doi: 10.3389/fpls.2017.01463 (PMC5591941; doi:10.3389/fpls.2017.01463)
Supplement: Supplementary file 6 [file Data_Sheet_1.XLSX]

## Sheet: Table S1
Supplementary Table S1. Methanogenic potential (mL/g DM) measurements of the biparental population (2009 trial) and details of the custom SNP array genotypic data availablity
Polpulation_ID	F2_IDs	Methanogenic_potential (mL CH4/g DM)	SE	CustomAffy_SNP_Genotype Data
92S80	233	40.1287	4.13996	Available
92S80	234	38.2588	3.9791	Available
92S80	235	39.0078	4.34131	Available
92S80	236	47.1907	4.11564	N/A
92S80	237	41.1826	4.28153	Available
92S80	239	44.098	5.33615	Available
92S80	240	43.8154	4.13996	Available
92S80	241	42.6428	5.32399	Available
92S80	243	41.3918	4.13384	Available
92S80	245	50.5019	3.79874	N/A
92S80	246	42.7327	4.52027	Available
92S80	247	37.6394	4.29195	Available
92S80	250	37.8182	4.29091	Available
92S80	251	43.3444	3.78846	Available
92S80	252	*	*	N/A
92S80	253	49.623	3.90193	N/A
92S80	254	40.3559	4.29514	Available
92S80	255	46.3239	4.13908	Available
92S80	256	49.9228	3.96514	Available
92S80	257	41.8319	4.13769	N/A
92S80	258	41.1	4.85791	Available
92S80	259	39.2751	4.29514	N/A
92S80	260	37.4616	4.2042	N/A
92S80	261	44.709	4.84662	N/A
92S80	262	45.2991	4.13384	N/A
92S80	263	38.9963	4.50137	Available
92S80	264	48.767	4.27686	Available
92S80	267	50.2908	4.86063	Available
92S80	269	42.5163	5.31436	Available
92S80	270	34.0993	8.13784	Available
92S80	271	44.5806	5.31436	Available
92S80	272	41.622	5.33615	Available
92S80	273	42.3049	4.29195	Available
92S80	274	38.941	4.1285	N/A
92S80	275	39.9119	5.3241	Available
92S80	276	41.8939	5.32399	Available
92S80	278	39.4363	5.33615	N/A
92S80	279	43.6727	4.30391	N/A
92S80	280	39.7353	5.33615	Available
92S80	281	43.3377	4.29195	Available
92S80	284	42.5163	4.87233	Available
92S80	285	39.7168	4.84662	Available
92S80	286	37.6309	8.13784	Available
92S80	288	33.1777	4.11564	N/A
92S80	289	46.5798	5.32399	Available
92S80	290	39.3178	4.86063	Available
92S80	291	*	*	Available
92S80	293	*	*	N/A
92S80	295	51.143	5.33615	Available
92S80	296	40.73	4.12418	Available
92S80	297	41.2723	4.87233	Available
92S80	298	43.9772	4.84662	Available
92S80	301	39.6114	3.38963	Available
92S80	302	42.0275	3.37204	Available
92S80	303	*	*	Available
92S80	304	45.463	4.85768	Available
92S80	305	42.5947	5.3241	Available
92S80	306	42.6606	5.3241	Available
92S80	307	41.5558	4.85791	Available
92S80	308	49.1712	4.84662	Available
92S80	309	43.2953	4.84662	N/A
92S80	310	40.4152	4.13023	Available
92S80	311	42.5576	4.86063	Available
92S80	312	30.9659	4.84662	Available
92S80	313	*	*	Available
92S80	318	42.1009	4.85791	Available
92S80	319	40.2315	5.32399	Available
92S80	320	40.1936	4.85791	Available
92S80	321	39.5174	4.85791	Available
92S80	322	49.1108	4.87257	N/A
92S80	323	45.5258	4.85768	N/A
92S80	324	41.4402	4.87233	Available
92S80	325	40.7789	4.85791	Available
92S80	326	43.1465	4.87233	Available
92S80	327	46.6468	4.87257	Available
92S80	328	43.6249	4.85768	Available
92S80	329	43.1475	4.86063	Available
92S80	330	42.5163	8.13784	Available
92S80	331	*	*	N/A
92S80	332	43.0058	4.12418	Available
92S80	335	54.3891	5.32624	Available
92S80	336	*	*	Available
92S80	337	42.5163	4.86063	Available
92S80	338	*	*	N/A
92S80	339	44.7957	4.85768	Available
92S80	340	38.4266	4.87233	Available
92S80	341	*	*	N/A
92S80	342	*	*	N/A
92S80	343	*	*	Available
92S80	344	36.0237	4.86063	Available
92S80	345	39.5881	4.87257	Available
92S80	346	31.9298	4.11643	Available
92S80	347	40.8447	5.31436	Available
92S80	348	30.7751	4.87257	N/A
92S80	349	33.1724	4.87233	Available
92S80	352	51.5293	4.87233	Available
92S80	353	-100	5.32399	Available
92S80	354	32.0244	5.31436	Available
92S80	355	40.2226	4.85791	Available
92S80	356	46.3813	4.87233	Available
92S80	357	42.665	4.52357	Available
92S80	358	34.6041	4.87257	Available
92S80	359	38.598	4.85768	Available
92S80	360	39.6273	4.84662	Available
92S80	361	43.7942	5.33459	Available
92S80	362	44.2551	4.52357	Available
92S80	363	43.22	4.84662	Available
92S80	364	39.6453	4.87233	Available
92S80	365	29.8908	4.13908	Available
92S80	366	47.7856	5.31436	Available
92S80	369	51.1313	4.85791	Available
92S80	370	39.4335	5.32399	Available
92S80	371	48.5091	5.31436	Available
92S80	372	37.3309	4.85791	Available
92S80	373	43.7099	4.1285	Available
92S80	374	43.7904	4.85791	Available
92S80	375	*	*	N/A
92S80	376	44.7295	5.3241	Available
92S80	377	41.5426	8.13784	Available
92S80	378	*	*	Available
92S80	379	47.4401	4.86063	Available
92S80	380	33.0578	4.85791	Available
92S80	381	47.8969	8.13784	Available
92S80	382	42.5163	5.31436	Available
92S80	386	43.2819	5.33615	Available
92S80	387	42.0657	5.33615	Available
92S80	388	41.3112	4.1285	N/A
92S80	389	48.4009	4.85768	Available
92S80	391	*	*	N/A
92S80	392	36.6047	4.85768	Available
92S80	393	43.6042	4.87233	Available
92S80	394	39.466	4.87257	Available
92S80	395	41.9915	4.85791	Available
92S80	396	38.5905	4.13996	Available
92S80	398	40.6414	4.87257	Available
92S80	399	42.6275	4.87233	Available
92S80	400	42.8571	4.85768	Available
92S80	401	43.4337	4.87233	N/A
92S80	402	*	*	N/A
92S80	403	44.6482	4.84662	Available
92S80	404	38.8693	4.86063	Available
92S80	405	39.3975	4.84662	Available
92S80	406	36.4663	4.84662	Available
92S80	407	48.395	4.87257	Available
92S80	408	43.3261	4.13996	Available
92S80	409	49.14	4.84662	Available
92S80	410	43.6047	4.87233	Available
92S80	411	43.3803	4.85791	Available
92S80	414	37.7898	4.85768	Available
92S80	415	43.3979	4.87233	Available
92S80	418	45.8388	8.13784	Available
92S80	419	44.296	4.84662	Available
92S80	420	42.0936	4.87257	Available
92S80	422	*	*	N/A
92S80	424	42.5163	5.33459	Available
92S80	425	46.6382	4.87233	Available
92S80	426	40.3467	4.86063	Available
92S80	427	37.3653	5.33615	Available
92S80	428	41.9463	4.85791	Available
92S80	431	42.1233	5.31436	Available
92S80	432	49.4231	4.13384	N/A
92S80	433	43.4364	4.85791	Available
92S80	434	46.9857	4.11564	Available
92S80	435	42.0063	4.86063	Available
92S80	436	43.7869	4.53078	Available
92S80	437	43.9324	8.13784	Available
92S80	438	49.05	5.31436	Available
92S80	439	49.0286	8.13784	N/A
92S80	440	42.5163	8.13784	Available
92S80	441	59.8632	8.13784	N/A
92S80	442	42.5163	5.33615	Available
92S80	443	42.5163	8.13784	Available
92S80	444	42.5163	4.87257	Available
92S80	445	45.7409	4.86063	Available
92S80	448	*	*	N/A
92S80	449	42.5163	5.32399	Available
92S80	450	*	*	N/A
92S80	451	48.4815	4.49846	Available
92S80	452	43.7271	4.86063	Available
92S80	454	38.8716	4.84662	Available
92S80	455	42.5198	4.86063	Available
92S80	456	41.6412	4.86063	Available
92S80	457	47.1179	4.86063	Available
92S80	459	44.6282	4.86063	Available
92S80	460	43.9708	4.87233	Available
92S80	461	41.0959	4.86063	Available
92S80	465	42.3731	4.86063	Available
92S80	466	38.7231	4.86063	Available
92S80 (Parent)	299 (Daliak)	37.08	8.6	N/A
92S80 (Parent)	300 (Woogenellup)	34.14	3.32	N/A

## Sheet: Table S2
Supplementary Table S2. Methanogenic potential (mL/g DM) measurements of the 125 diverity germplasm panel population (2011 trial) with the centre of origin, passport and BIOCLIM data availability details
Line number	Line name	Category	Subspecies*	Source	Origin	Ecogeographic core	Agromorphological core	Molecular core-97 members	Latitude	Longitude	Altitude	Soil pH	Soil texture**	BIO1 (Annual mean temp)***	BIO2 (Mean diurnal range)***	BIO3 (Isothermality)***	BIO4 (Temp seasonality)***	BIO5 (Max temp warmest month)***	BIO6 (Min temp coldest month)***	BIO7 (Temp annual range)***	BIO8 (Mean temp wettest Q)***	Bio9 (Mean temp driest Q)***	BIO10 (Mean temp warmest Q)***	BIO11 (Mean temp coldest Q)***	BIO12 (Annual precip)***	BIO13 (Precip wettest month)***	BIO14 (Precip driest month)***	BIO15 (Precip seasonality)***	BIO16 (Precip wettest Q)***	BIO17 (Precip driest Q)***	BIO18 (Precip warmest Q)***	BIO19 (Precip coldest Q)***	Methanogenic Potetial (mL/g DM)
1	L01	Core	S	ATGRC	Italy	Yes	Yes	Yes	40.7	9.06	240	6	1	15.6	7.7	3.3	538.8	28.6	5.7	22.9	13.3	22.5	22.8	9.1	634	96	6	55	268	41	58	235	27.6085
2	L02	Core	B	ATGRC	Israel	Yes	Yes	Yes	32.72	35.39	200	*	*	20.1	10.4	4.2	560.8	32.8	8.1	24.7	12.9	26.5	26.7	12.9	517	138	0	108	345	0	1	303	25.5664
3	L03	Core	B	ATGRC	Greece	No	Yes	Yes	39.88	20.63	460	*	*	12.6	10.5	3.6	638.7	29	-0.1	29.1	5.9	21	21	4.6	1169	180	27	53	504	95	95	464	25.9835
4	L04	Core	S	ATGRC	Yugoslavia	Yes	Yes	Yes	42.82	22.13	300	*	*	9.9	10.5	3.4	710.6	26.3	-4.3	30.6	13.6	2	18.7	0.4	570	66	37	17	170	122	143	132	26.0079
5	L05	Core	S	ATGRC	Italy	Yes	Yes	Yes	38.59	16.28	800	6	1	13.7	6.9	3.1	547.4	26.1	4	22.1	8.8	20.7	20.9	7.2	924	140	20	53	387	70	103	362	25.482
6	L06	Core	S	ATGRC	Morocco	Yes	Yes	Yes	33.87	6.87	3	*	*	21.8	13.4	3.7	771.3	40.8	5.2	35.6	16.8	31.8	31.8	12	84	11	0	42	29	5	5	25	28.7946
7	L07	Core	S	ATGRC	Greece	Yes	Yes	Yes	39.75	22.37	69	*	*	15.7	12.2	3.6	725.6	34.1	0.7	33.4	12	25.2	25.2	6.6	473	59	15	35	174	63	63	142	26.1481
8	L08	Core	B	ATGRC	Israel	Yes	Yes	Yes	32.72	35.39	200	7.2	*	20.1	10.4	4.2	560.8	32.8	8.1	24.7	12.9	26.5	26.7	12.9	517	138	0	108	345	0	1	303	25.2533
9	L09	Core	S	ATGRC	Morocco	Yes	Yes	Yes	34.29	-6.6	20	*	1	18	9.7	4.5	408.7	28.6	7.4	21.2	13.7	23	23.2	12.7	575	116	0	79	293	7	10	270	28.0659
10	L10	Core	S	ATGRC	Greece	Yes	Yes	Yes	39.7	21.6	216	*	*	14.3	11.9	3.5	723.3	32.7	-0.5	33.2	10.6	23.2	23.6	5	734	104	19	40	264	83	84	262	27.5438
11	L11	Core	S	ATGRC	Italy	Yes	Yes	Yes	39.51	16.4	745	6	1	13.7	6.3	2.8	568.3	26.3	4.2	22.1	11.3	21.1	21.2	7	869	124	17	49	352	76	101	317	27.7447
12	L12	Core	S	ATGRC	Tunisia	Yes	Yes	Yes	37.15	9.47	338	5.5	2	*	*	*	*	*	*	*	*	*	*	*	*	*	*	*	*	*	*	*	27.6215
13	L13	Core	S	ATGRC	Tunisia	Yes	Yes	Yes	36.75	8.68	650	7	2	16.4	11.9	3.9	630.9	33.8	3.9	29.9	8.7	24.5	24.8	8.7	997	161	5	63	452	38	64	452	27.7467
14	L14	Core	S	ATGRC	Turkey	Yes	Yes	Yes	36.7	29.2	680	8	*	15.6	12.5	4	647.6	32.6	2	30.6	7.6	24	24	7.6	862	201	5	92	511	26	26	511	23.5606
15	L15	Core	S	ATGRC	Turkey	Yes	Yes	Yes	36.3	29.5	1250	9	3	12.9	11.2	3.7	670.4	29.5	-0.5	30	4.5	21.5	21.5	4.5	751	163	8	84	427	30	36	427	26.5369
16	L16	Core	S	ATGRC	Turkey	Yes	Yes	Yes	40.98	39.82	30	6	2	13.3	7.6	3.1	582.5	25.7	1.9	23.8	11.3	20.7	20.8	6.1	893	114	43	28	313	162	179	215	27.2968
17	L17	Core	B	ATGRC	Turkey	Yes	Yes	Yes	40.04	26.63	300	*	*	13.6	10.4	3.6	655.9	29.7	0.9	28.8	7.2	22.1	22.1	5.6	703	123	12	60	321	52	52	312	28.5738
18	L18	Core	B	ATGRC	Turkey	Yes	Yes	Yes	38.4	27.03	20	6.7	*	16	10.3	3.6	637.5	31.6	3.6	28	8.2	24.4	24.4	8.2	706	147	3	83	388	15	15	388	27.3384
19	L19	Core	B	ATGRC	Turkey	Yes	Yes	Yes	38.36	26.78	5	9	3	16.9	9.8	3.6	612.1	31.8	4.9	26.9	9.4	24.9	24.9	9.4	653	138	2	85	367	10	10	367	26.7209
20	L20	Core	S	ATGRC	Greece	Yes	Yes	Yes	35.23	24.88	1300	6.5	*	11.3	7.1	3.2	543.7	23.3	1.5	21.8	4.8	18.4	18.4	4.7	1015	212	5	81	537	28	28	483	26.8234
21	L21	Core	S	ATGRC	Greece	Yes	Yes	Yes	37.13	22.44	320	7	2	15	9.9	3.8	567.7	29.4	3.7	25.7	9.7	22.4	22.4	8.1	747	139	8	71	371	30	30	343	25.366
22	L22	Core	B	ATGRC	Greece	Yes	Yes	Yes	37.82	22.15	470	6.5	1	13.2	10.9	3.9	600	28.9	1.1	27.8	7.4	21	21	5.9	842	146	13	63	392	52	52	370	26.2718
23	L23	Core	B	ATGRC	Greece	Yes	Yes	Yes	38.54	21.41	20	6.5	*	16.7	10	3.6	610.6	31.9	4.5	27.4	10.7	24.6	24.6	9.2	909	152	11	65	423	45	45	390	27.1167
24	L24	Core	S	ATGRC	Greece	Yes	Yes	Yes	38.71	21.33	80	*	1	16.4	10.2	3.6	626.1	32	4	28	10.1	24.5	24.5	8.7	945	157	13	63	432	52	52	404	27.6965
25	L25	Core	S	ATGRC	Greece	Yes	Yes	Yes	39.6	20.86	480	6.7	*	13.2	10.9	3.6	646.3	29.9	0.2	29.7	6.4	21.6	21.6	5.1	1069	165	24	52	458	90	90	423	26.8615
26	L26	Core	S	ATGRC	Greece	Yes	Yes	Yes	39.65	20.54	150	*	*	14.2	10.4	3.6	622.3	30.1	1.7	28.4	7.7	22.3	22.3	6.4	1175	189	19	60	527	73	73	487	26.9604
27	L27	Core	S	ATGRC	Greece	Yes	Yes	Yes	39.22	22.08	145	7	4	15.4	11.5	3.5	704.6	33.2	1.2	32	6.5	24.2	24.5	6.5	708	109	14	45	273	70	73	273	27.1429
28	L28	Core	S	ATGRC	Greece	Yes	Yes	Yes	39.11	22.03	570	6	*	14	11.3	3.5	692	31.6	0.2	31.4	6.8	22.6	23	5.3	761	115	16	45	294	77	81	293	25.3517
29	L29	Core	S	ATGRC	Spain	Yes	Yes	Yes	39.14	-6.6	350	*	*	16.3	11.3	3.8	620.1	33.8	4.1	29.7	9.5	24.5	24.5	8.7	538	71	4	51	206	35	35	194	26.535
30	L30	Core	S	ATGRC	Italy	Yes	Yes	Yes	39.09	8.74	130	6	1	15.9	8.8	3.7	525.4	29.2	5.7	23.5	11	22.7	23	9.8	574	83	4	57	234	25	52	225	25.2138
31	L31	Core	B	ATGRC	Italy	Yes	Yes	Yes	39.3	8.76	60	7	5	16.2	9.3	3.8	534.2	30	5.6	24.4	13.9	23.1	23.3	9.9	527	77	4	56	212	25	50	199	25.9372
32	L32	Core	B	ATGRC	Italy	Yes	Yes	Yes	39.35	8.62	260	8	1	14.1	8.3	3.5	548	27.9	4.2	23.7	9	21.2	21.5	7.8	726	107	7	56	300	39	62	287	25.2615
33	L33	Core	B	ATGRC	Italy	Yes	Yes	Yes	39.4	8.47	330	7.5	3	14.5	8.1	3.5	532.1	27.9	4.8	23.1	9.6	21.4	21.7	8.4	730	111	6	58	308	35	60	289	25.6793
34	L34	Core	S	ATGRC	Italy	Yes	Yes	Yes	40.36	8.78	660	5.5	3	13.3	8	3.3	574.7	27.6	3.4	24.2	7.8	20.9	21.1	6.6	894	137	8	57	373	58	68	351	26.796
35	L35	Core	S	ATGRC	Italy	Yes	Yes	Yes	40.7	9.04	200	5.5	1	15.6	7.7	3.3	538.8	28.6	5.7	22.9	13.3	22.5	22.8	9.1	634	96	6	55	268	41	58	235	28.2917
36	L36	Core	S	ATGRC	Italy	Yes	Yes	Yes	40.7	9.04	200	5.5	1	15.6	7.7	3.3	538.8	28.6	5.7	22.9	13.3	22.5	22.8	9.1	634	96	6	55	268	41	58	235	29.1416
37	L37	Core	S	ATGRC	Italy	Yes	Yes	Yes	40.58	9.18	700	5.5	1	13.3	7.3	3.1	568.7	26.9	3.5	23.4	10.7	20.8	21	6.7	776	117	10	52	309	58	69	292	25.6094
38	L38	Core	S	ATGRC	Italy	Yes	Yes	Yes	40.58	9.18	700	5.5	1	13.3	7.3	3.1	568.7	26.9	3.5	23.4	10.7	20.8	21	6.7	776	117	10	52	309	58	69	292	28.3655
39	L39	Core	S	ATGRC	Italy	Yes	Yes	Yes	39.35	9.55	10	5.5	2	16.7	7.2	3.3	515.9	29.2	7.5	21.7	14.8	23.4	23.8	10.9	346	49	3	51	139	21	49	103	26.2606
40	L40	Core	S	ATGRC	Italy	Yes	Yes	Yes	39.35	9.47	250	6	2	15.7	7.5	3.3	534.1	28.7	6.3	22.4	13.6	22.7	23	9.7	405	56	5	49	159	26	54	143	24.2839
41	L41	Core	S	ATGRC	Italy	Yes	Yes	Yes	39.28	9.33	150	6.5	1	16	7.9	3.4	528.6	29.1	6.3	22.8	13.9	22.9	23.2	10	397	53	4	50	156	23	50	142	25.6047
42	L42	Core	S	ATGRC	Spain	Yes	Yes	Yes	40.8	-5.5	840	5.5	1	11.8	11.7	3.9	612.2	29.2	-0.2	29.4	7.8	19.8	20.1	4.4	418	50	11	33	134	56	58	116	26.1988
43	L43	Core	B	ATGRC	Portugal	Yes	Yes	Yes	37.67	-8.15	260	6.5	2	16.2	10.3	4.2	473.6	30.4	6.2	24.2	11.4	22.2	22.7	10.6	567	86	2	63	252	23	23	245	26.3888
44	L44	Core	S	ATGRC	Portugal	Yes	Yes	Yes	37.63	-8.23	200	6	2	16.2	10.1	4.2	461	30	6.4	23.6	11.5	22	22.5	10.7	565	87	2	64	254	22	23	246	27.9722
45	L45	Core	S	ATGRC	Portugal	Yes	Yes	Yes	37.86	-8.17	220	5.7	2	16.6	10.3	4.2	470.3	30.8	6.7	24.1	11.8	22.5	23	11	559	84	2	63	246	23	23	240	26.0933
46	L46	Core	S	ATGRC	France	Yes	Yes	Yes	42.16	8.78	460	5.8	1	13.7	6.7	3.2	507.2	25.3	4.6	20.7	11.7	20.3	20.5	7.7	712	100	11	45	281	63	88	234	26.2578
47	L47	Core	S	ATGRC	France	Yes	Yes	Yes	44.11	-0.3	100	5.7	1	12.4	10.8	4.2	540.9	26.3	0.7	25.6	6.2	19.2	19.2	5.4	948	107	54	16	288	197	197	271	26.6777
48	L48	Core	S	ATGRC	France	Yes	Yes	Yes	44.83	-0.75	40	7	1	12.6	9.9	4.1	516.5	25.7	1.8	23.9	6.7	19.1	19.1	5.9	963	108	53	20	307	187	187	282	26.6621
49	L49	Core	S	ATGRC	Israel	Yes	Yes	Yes	33.21	35.77	1100	5.5	2	14.8	9.6	3.6	608.7	28.6	2.4	26.2	6.7	21.9	21.9	6.7	740	176	0	105	479	1	1	479	26.6616
50	L50	Core	S	ATGRC	Italy	Yes	Yes	Yes	39.16	9.45	410	6	1	16.6	7	3.2	513.7	28.9	7.5	21.4	14.7	23.3	23.6	10.8	329	46	3	51	126	17	48	104	27.0416
51	L51	Core	S	ATGRC	Italy	Yes	Yes	Yes	40.33	9.3	570	6.5	1	14.2	7.7	3.2	562.9	27.9	4.4	23.5	11.7	21.6	21.8	7.6	700	109	8	52	284	50	64	263	26.2865
52	L52	Core	S	Old subs	Portugal	Yes	Yes	Yes	41.18	-6.93	675	*	*	27.3	15.7	5.9	276.2	39.5	12.9	26.6	26.9	23.7	31	23.7	537	189	0	140	433	0	82	0	25.2941
53	L53	Core	S	ATGRC	Spain	Yes	Yes	Yes	38.46	-6.05	450	5.8	*	16	12	3.8	651.5	34.5	3.1	31.4	8.9	24.6	24.6	8	577	76	4	54	221	30	30	210	24.5384
54	L54	Core	B	ATGRC	Greece	Yes	Yes	Yes	39.17	23.48	50	7.5	1	16.5	9.2	3.3	658.2	31.8	4.1	27.7	10.1	25.2	25.2	8.5	503	77	12	50	206	47	47	198	25.3433
55	L55	Core	B	ATGRC	Greece	Yes	Yes	Yes	39.17	23.48	50	7.5	1	16.5	9.2	3.3	658.2	31.8	4.1	27.7	10.1	25.2	25.2	8.5	503	77	12	50	206	47	47	198	26.2262
56	L56	Core	B	ATGRC	Greece	Yes	Yes	Yes	39.11	26.27	250	8.5	1	15.7	8.2	3.3	603.6	29.7	4.9	24.8	8.5	23.7	23.7	8.5	651	134	5	79	347	23	23	347	25.9737
57	L57	Core	S	ATGRC	Greece	Yes	Yes	Yes	38.96	26.39	15	8	1	16.1	8.3	3.3	605.5	30.3	5.2	25.1	8.9	24.2	24.2	8.9	661	138	4	81	359	19	19	359	26.6512
58	L58	Core	S	ATGRC	Italy	Yes	No	Yes	39.44	16.3	580	6.5	1	15.3	6.5	2.9	555.4	27.6	5.8	21.8	13	22.4	22.6	8.7	865	126	15	51	355	68	97	322	27.0046
59	L59	Core	B	ATGRC	Italy	Yes	Yes	Yes	39.3	9.16	94	7.9	4	16.3	8.8	3.7	525	29.5	5.9	23.6	14.1	23.1	23.3	10.1	420	56	3	52	166	21	46	153	26.4828
60	L60	Core	B	ATGRC	Italy	Yes	Yes	Yes	39.3	9.16	94	7.9	4	16.3	8.8	3.7	525	29.5	5.9	23.6	14.1	23.1	23.3	10.1	420	56	3	52	166	21	46	153	27.3465
61	L61	Core	B	ATGRC	Italy	Yes	Yes	Yes	39.39	9.16	170	7.8	4	16	8.9	3.6	538.1	29.7	5.6	24.1	13.7	23	23.2	9.7	448	60	4	51	176	26	50	162	24.5779
62	L62	Core	B	ATGRC	Italy	Yes	Yes	Yes	39.53	9.1	160	8.5	5	15.7	8.8	3.6	547.5	29.6	5.3	24.3	13.3	22.8	23	9.3	495	71	5	51	199	30	54	180	25.8808
63	L63	Core	S	ATGRC	Italy	Yes	Yes	Yes	40.04	8.93	540	*	1	14.1	8.2	3.3	568.8	28.3	4	24.3	11.5	21.5	21.7	7.4	772	121	8	55	317	51	65	299	28.4933
64	L64	Core	S	ATGRC	Italy	Yes	Yes	Yes	40.42	8.74	488	7.1	4	14.3	8.1	3.3	563.4	28.4	4.3	24.1	11.8	21.7	21.9	7.7	804	128	6	57	342	49	63	311	27.4226
65	L65	Core	S	ATGRC	Italy	Yes	Yes	Yes	40.42	8.74	488	7.1	4	14.3	8.1	3.3	563.4	28.4	4.3	24.1	11.8	21.7	21.9	7.7	804	128	6	57	342	49	63	311	27.3212
66	L66	Core	B	ATGRC	Italy	Yes	Yes	Yes	40.17	8.93	265	6	3	15.8	8.4	3.5	544.6	29.5	5.6	23.9	13.4	22.9	23.1	9.4	642	100	5	57	276	38	56	242	27.9241
67	L67	Core	S	ATGRC	Italy	Yes	Yes	Yes	39.36	9.57	40	6.6	2	16.7	7.2	3.3	515.9	29.2	7.5	21.7	14.8	23.4	23.8	10.9	346	49	3	51	139	21	49	103	27.3327
68	L68	Core	S	ATGRC	Italy	Yes	Yes	Yes	39.42	9.24	550	6.3	5	14.5	8.2	3.4	560.2	28.5	4.6	23.9	12.1	21.9	22.1	8.1	538	80	7	50	211	37	60	200	25.6601
69	L69	Core	S	ATGRC	Italy	Yes	Yes	Yes	39.51	9.25	650	6.4	5	14.5	8	3.3	561.4	28.4	4.5	23.9	12	21.8	22.1	8	539	82	7	50	212	38	61	200	29.1691
70	L70	Core	S	ATGRC	Italy	Yes	Yes	Yes	39.51	9.25	650	6.4	5	14.5	8	3.3	561.4	28.4	4.5	23.9	12	21.8	22.1	8	539	82	7	50	212	38	61	200	22.3941
71	L71	Core	B	ATGRC	Italy	Yes	Yes	Yes	40.11	9.28	990	6.2	2	11.6	7.2	3	589.3	25.6	1.6	24	4.8	19.5	19.6	4.8	870	128	11	51	330	62	72	330	28.0717
72	L72	Core	B	ATGRC	Italy	Yes	Yes	Yes	40.58	9.1	800	6.3	1	12.9	7.3	3.1	572.4	26.5	3	23.5	10.2	20.4	20.6	6.1	824	123	10	52	326	61	71	312	27.0147
73	L73	Core	S	ATGRC	Italy	Yes	Yes	Yes	40.54	9.22	640	5.5	2	13.3	7.3	3.1	568.7	26.9	3.5	23.4	10.7	20.8	21	6.7	776	117	10	52	309	58	69	292	26.4563
74	L74	Core	S	ATGRC	Italy	Yes	Yes	Yes	40.43	9.14	270	7.3	5	15	7.9	3.3	552.8	28.5	5	23.5	12.5	22.2	22.4	8.5	683	105	7	55	285	46	61	257	28.4458
75	L75	Core	S	ATGRC	Italy	Yes	Yes	Yes	37.9	15.05	550	7.5	3	13.9	7	3	582	27.1	3.9	23.2	11.6	21.6	21.6	7.2	634	96	13	53	258	46	80	209	27.0807
76	L76	Core	S	Spain main	Spain	Yes	Yes	Yes	43.22	-8.25	93	*	*	13.6	7.4	4.1	361.9	23.6	5.6	18	9.8	18.1	18.5	9.2	1134	153	33	40	426	128	148	396	25.3003
77	L77	Core	S	Spain main	Spain	Yes	Yes	Yes	38.72	-3.97	738	*	*	14	12.7	3.8	690.8	33.9	0.5	33.4	12.2	23.4	23.4	5.8	507	65	5	46	180	37	37	160	26.6797
78	L78	Core	S	Spain main	Spain	Yes	Yes	Yes	38.38	-6.8	566	*	*	15.2	11.3	3.8	602.4	32.4	3.3	29.1	8.8	23.1	23.3	8	621	84	4	54	244	35	37	234	26.1622
79	L79	Core	B	Spain main	Bulgaria	Yes	Yes	Yes	*	*	28	*	*	*	*	*	*	*	*	*	*	*	*	*	*	*	*	*	*	*	*	*	26.9145
80	L80	Core	S	Spain 2006	Spain	Yes	Yes	Yes	39.58	-5.55	621	5.8	3	14.7	11.6	3.7	662.9	33.2	2	31.2	7.5	23.6	23.6	6.7	475	58	6	45	164	38	38	152	26.6691
81	L81	Core	B	ATGRC	Spain	Yes	Yes	Yes	38.68	-7.05	260	*	*	16.6	11.4	3.9	589.3	33.5	4.7	28.8	10.3	24.3	24.4	9.4	542	75	4	52	213	34	35	203	26.6433
82	L82	Core	B	ATGRC	Spain	Yes	Yes	Yes	38.32	-4.32	700	*	*	15.1	12.2	3.6	695.8	34.7	1.7	33	7.9	24.5	24.5	6.7	584	84	5	52	216	31	31	204	25.8569
83	L83	Core	S	ATGRC	Spain	Yes	Yes	Yes	38.9	-6.33	240	*	*	16.7	11.7	3.8	636.8	34.7	4.1	30.6	9.7	25.1	25.1	8.9	498	65	3	52	189	29	29	177	26.4586
84	L84	Core	S	ATGRC	Morocco	Yes	Yes	Yes	33.49	-6.17	900	7	2	16.8	14.2	4.4	590.5	34.5	2.9	31.6	10.5	24.4	24.7	9.6	547	86	1	67	229	13	16	227	26.4358
85	L85	Core	S	DEU IPK	Morocco	Yes	Yes	Yes	33.83	-6.53	326	*	*	17.7	12.3	4.5	502.8	32.5	5.5	27	12.5	24	24.4	11.5	500	88	0	72	225	7	10	219	27.1269
86	L86	Core	B	Perugia	Italy	Yes	Yes	Yes	42.74	10.37	46	*	*	15.2	6.3	2.9	535	27.3	6.1	21.2	12.9	22.1	22.4	8.9	587	80	12	41	223	65	94	176	23.9923
87	L87	Core	S	GRIN	Tunisia	Yes	Yes	Yes	37.77	8.92	100	5.9	*	17.7	9.7	3.9	553.6	31.6	6.8	24.8	11	24.6	25.1	11	854	156	4	68	408	26	53	408	27.7978
88	L88	Core	S	ATGRC	Italy	Yes	Yes	Yes	37.9	15.05	550	7.5	3	13.9	7	3	582	27.1	3.9	23.2	11.6	21.6	21.6	7.2	634	96	13	53	258	46	80	209	25.0402
89	L89	Core	S	ATGRC	Italy	Yes	Yes	Yes	38.38	14.98	400	*	1	17.2	6.9	3.1	528.5	29.6	7.9	21.7	15.4	24	24.4	11.1	650	95	11	54	262	41	82	220	26.7039
90	L90	Core	B	ATGRC	Italy	Yes	Yes	Yes	38.03	15.13	770	*	4	15.2	7.1	3.1	563.9	28.1	5.4	22.7	13	22.6	22.8	8.7	672	98	13	52	271	48	85	225	23.3242
91	L91	Core	B	ATGRC	Italy	Yes	Yes	Yes	37.98	15.2	860	*	3	13.6	6.9	3	576.7	26.6	3.7	22.9	11.3	21.2	21.3	6.9	682	99	15	52	274	52	86	226	26.8973
92	L92	Core	B	ATGRC	Italy	Yes	Yes	Yes	37.65	14.55	480	*	4	15.6	7.7	3.2	565.9	28.8	5.3	23.5	13.4	22.9	23.1	9	496	84	7	57	214	30	59	158	25.3771
93	L93	Core	S	ATGRC	Italy	Yes	Yes	Yes	37.73	14.37	840	*	4	14	6.7	2.8	594.6	27.3	4	23.3	11.5	21.8	21.9	7.1	490	78	9	54	204	34	63	171	28.2803
94	L94	Core	B	ATGRC	Italy	Yes	Yes	Yes	37.83	14.48	950	*	4	13.8	6.7	2.8	596.8	27.2	3.8	23.4	11.4	21.7	21.7	6.9	512	80	10	53	210	37	37	164	26.9642
95	L95	Core	B	ATGRC	Italy	Yes	Yes	Yes	37.93	14.05	440	*	4	14.7	6.5	2.8	575.2	27.6	5	22.6	12.4	22.3	22.4	8.1	520	76	8	54	215	33	63	169	25.1036
96	L96	Core	S	DAFWA	X-bred	No	No	Yes	*	*	*	*	*	*	*	*	*	*	*	*	*	*	*	*	*	*	*	*	*	*	*	*	28.2642
97	L97	Core	S	DAFWA	X-bred	No	No	Yes	*	*	*	*	*	*	*	*	*	*	*	*	*	*	*	*	*	*	*	*	*	*	*	*	27.4482
98	Antas	Cultivar	B	ATGRC	Italy	*	*	*	39.5	8.67	160	6.5	2	14.7	8.6	3.5	546	28.6	4.6	24	9.6	21.8	22.1	8.4	658	96	6	55	267	36	59	254	26.687
99	Bindoon	Cultivar	S	DAFWA	Crossbred	*	*	*	*	*	*	*	*	*	*	*	*	*	*	*	*	*	*	*	*	*	*	*	*	*	*	*	24.4459
100	Campeda	Cultivar	S	ATGRC	Italy	*	*	*	40.39	8.66	442	7.6	3	15.2	8.3	3.4	551.1	29	5.1	23.9	12.8	22.3	22.6	8.6	735	122	5	59	320	41	59	282	24.9522
101	Clare	Cultivar	B	ATGRC	Australia (naturalised)	*	*	*	*	*	*	*	*	*	*	*	*	*	*	*	*	*	*	*	*	*	*	*	*	*	*	*	29.4941
102	Dalkeith	Cultivar	S	ATGRC	Australia (naturalised)	*	*	*	*	*	*	*	*	*	*	*	*	*	*	*	*	*	*	*	*	*	*	*	*	*	*	*	25.5875
103	Denmark	Cultivar	S	ATGRC	Italy	*	*	*	39.51	8.55	80	6	1	15.1	8.1	3.5	533.8	28.4	5.3	23.1	10.1	22	22.3	8.9	672	105	6	57	281	33	57	260	26.8397
104	Dinninup	Cultivar	S	ATGRC	Australia (naturalised)	*	*	*	*	*	*	*	*	*	*	*	*	*	*	*	*	*	*	*	*	*	*	*	*	*	*	*	26.1712
105	Dwalganup	Cultivar	S	ATGRC	Australia (naturalised)	*	*	*	*	*	*	*	*	*	*	*	*	*	*	*	*	*	*	*	*	*	*	*	*	*	*	*	26.1573
106	Geraldton	Cultivar	S	ATGRC	Australia (naturalised)	*	*	*	*	*	*	*	*	*	*	*	*	*	*	*	*	*	*	*	*	*	*	*	*	*	*	*	27.3286
107	Gosse	Cultivar	Y	SARDI	Crossbred	*	*	*	*	*	*	*	*	*	*	*	*	*	*	*	*	*	*	*	*	*	*	*	*	*	*	*	26.5124
108	Goulburn	Cultivar	S	ATGRC	Italy	*	*	*	40.86	9.12	500	5	1	12.9	6.6	2.9	555.4	25.8	3.4	22.4	10.4	20.2	20.4	6.4	771	113	11	50	307	62	73	284	25.0164
109	Izmir	Cultivar	S	ATGRC	Turkey	*	*	*	38.58	27.1	110	6.5	2	16	11.1	3.7	681.2	32.7	2.9	29.8	7.6	25	25	7.6	706	141	5	77	370	23	23	370	26.6149
110	Leura	Cultivar	S	ATGRC	Italy	*	*	*	40.98	9.15	550	5.7	1	14.1	6.7	3	538.6	26.5	4.8	21.7	11.8	21.1	21.4	7.7	686	101	9	51	280	53	67	250	25.6946
111	Losa	Cultivar	S	ATGRC	Italy	*	*	*	40.12	8.84	260	5.4	3	15.7	8.4	3.5	544.2	29.4	5.6	23.8	13.3	22.8	23	9.3	650	103	5	58	281	36	55	248	25.9884
112	Mintaro	Cultivar	B	SARDI	Crossbred	*	*	*	*	*	*	*	*	*	*	*	*	*	*	*	*	*	*	*	*	*	*	*	*	*	*	*	28.7442
113	Mt Barker	Cultivar	S	ATGRC	Australia (naturalised)	*	*	*	*	*	*	*	*	*	*	*	*	*	*	*	*	*	*	*	*	*	*	*	*	*	*	*	27.7471
114	Napier	Cultivar	Y	DAFWA	Crossbred	*	*	*	*	*	*	*	*	*	*	*	*	*	*	*	*	*	*	*	*	*	*	*	*	*	*	*	26.6724
115	Narrikup	Cultivar	S	DAFWA	Crossbred	*	*	*	*	*	*	*	*	*	*	*	*	*	*	*	*	*	*	*	*	*	*	*	*	*	*	*	33.7464
116	Nungarin	Cultivar	S	DAFWA	Crossbred	*	*	*	*	*	*	*	*	*	*	*	*	*	*	*	*	*	*	*	*	*	*	*	*	*	*	*	28.7473
117	Riverina	Cultivar	Y	DAFWA	Crossbred	*	*	*	*	*	*	*	*	*	*	*	*	*	*	*	*	*	*	*	*	*	*	*	*	*	*	*	24.5357
118	Rosabrook	Cultivar	S	DAFWA	Crossbred	*	*	*	*	*	*	*	*	*	*	*	*	*	*	*	*	*	*	*	*	*	*	*	*	*	*	*	26.2235
119	Rosedale	Cultivar	B	ATGRC	Turkey	*	*	*	38.53	27.13	450	8.5	2	15.1	10.7	3.7	662.6	31.2	2.3	28.9	6.9	23.7	23.7	6.9	739	149	5	78	393	23	23	393	27.1816
120	Seaton Park	Cultivar	S	ATGRC	Australia (naturalised)	*	*	*	*	*	*	*	*	*	*	*	*	*	*	*	*	*	*	*	*	*	*	*	*	*	*	*	29.1838
121	Trikkala	Cultivar	Y	DAFWA	Crossbred	*	*	*	*	*	*	*	*	*	*	*	*	*	*	*	*	*	*	*	*	*	*	*	*	*	*	*	25.9216
122	Woogenellup	Cultivar	S	ATGRC	Australia (naturalised)	*	*	*	*	*	*	*	*	*	*	*	*	*	*	*	*	*	*	*	*	*	*	*	*	*	*	*	25.2781
123	Yarloop	Cultivar	Y	ATGRC	Australia (naturalised)	*	*	*	*	*	*	*	*	*	*	*	*	*	*	*	*	*	*	*	*	*	*	*	*	*	*	*	26.8914
124	York	Cultivar	S	ATGRC	Italy	*	*	*	40.95	9.5	50	5.5	1	15.8	7.3	3.3	505.5	27.7	6	21.7	13.8	22.3	22.6	9.8	543	78	6	50	221	39	56	195	25.7851
		CAT. & SSP		SOURCE & ORIGIN		CORE CRITERIA			PASSPORT DATA					BIOCLIM DATA																			CH4
*Subspecies : S= subterraneum, Y= yanninicum, B= brachcalycinum
**Soil texture rated as 1= sand, 2= sandy loam, 3= loam, 4= clay loam and 5= loam.
***Bioclimatic variables are derived from the monthly temperature and rainfall values in order to generate more biologically meaningful variables. These are often used in ecological niche modeling (e.g., BIOCLIM, GARP). The bioclimatic variables represent annual trends (e.g., mean annual temperature, annual precipitation) seasonality (e.g., annual range in temperature and precipitation) and extre…

## Sheet: Table S3
Supplementary Table S3. PCR ready markers designed using primer3 for the Methanogenic potential (mL/g DM) significant SNP identified in the haplotype block on chr 5 in T. subterranean genome
SNP_position	Haplotype block start	Haplotype block end	Haplotype block length	SNPs in block	Forward Primer	Reverse Primer
49188043	49162448	49190077	27629	7	GGAGCCATATATCCACTGCA	TCAAGGCTGAAGGTTGTTCA
					CATAGCATATTCCGGAGCCA	TCAAGGCTGAAGGTTGTTCA
					GGAGCCATATATCCACTGCA	GCCACTAATGTGTTGCTTGA
					GGAGCCATATATCCACTGCA	AGCCACTAATGTGTTGCTTG
					GGAGCCATATATCCACTGCA	GGACCTCCAGAACACCAAAT

## Sheet: Table S4
Supplementary Table S4. Analysis of variance one way ANOVA test among methanogenic potential (mL/g DM) measurements and non-continuous variables (subspecies, core vs cultivars and country of origin
Source of variation	d.f.	Sum of Squares	Mean Square	F-value	P-value
Subspecies	2	4.012	2.0059	1.0013	0.3704
Residual	121	242.402	2.0033
Core vs Cutivars	1	1.385	1.3847	0.6895	0.408
Residual	122	245.029	2.0084
Country of origin	13	23.465	1.805	0.8905	0.5651
Residual	110	222.949	2.0268

## Sheet: Table S5
Supplementary Table S5. Correlations between Methanogenic potential (mL/g DM) measurements with continuous variables (latitude, longitude, altitude, soil pH and Bioclim variables)
Variable	Rsq	pval
Latitude	0.000916727	0.761431
Longitude	0.000437321	0.833926
Altitude	0.00261693	0.606048
Soil.pH	0.0223132	0.200863
Soil.texture	0.0168897	0.263164
BIO1..Annual.mean.temp.	0.000930632	0.760845
BIO2..Mean.diurnal.range.	0.000151808	0.90218
BIO3..Isothermality.	0.00177434	0.67422
BIO4..Temp.seasonality.	0.00929978	0.334948
BIO5..Max.temp.warmest.month.	0.000399531	0.841947
BIO6..Min.temp.coldest.month.	0.00494263	0.482584
BIO7..Temp.annual.range.	0.00402332	0.526504
BIO8..Mean.temp.wettest.Q.	0.00304565	0.581691
Bio9..Mean.temp.driest.Q.	0.00310828	0.577828
BIO10..Mean.temp.warmest.Q.	8.96137e-05	0.924767
BIO11..Mean.temp.coldest.Q.	0.00485829	0.486353
BIO12..Annual.precip.	0.00786889	0.375293
BIO13..Precip.wettest.month.	0.00160051	0.689728
BIO14..Precip.driest.month.	3.30284e-05	0.954284
BIO15..Precip.seasonality.	0.00290576	0.590511
BIO16..Precip.wettest.Q.	0.00227609	0.633958
BIO17..Precip.driest.Q.	0.00108724	0.742156
BIO18..Precip.warmest.Q.	0.00162461	0.687521
BIO19..Precip.coldest.Q.	0.00910602	0.340058
